# Supplementary material
Source: PubMed Central journal article supplement (PMC4378245)
Supplement: supp_dev.115493_DEV115493supp.pdf [file supp_dev.115493_DEV115493supp.pdf]

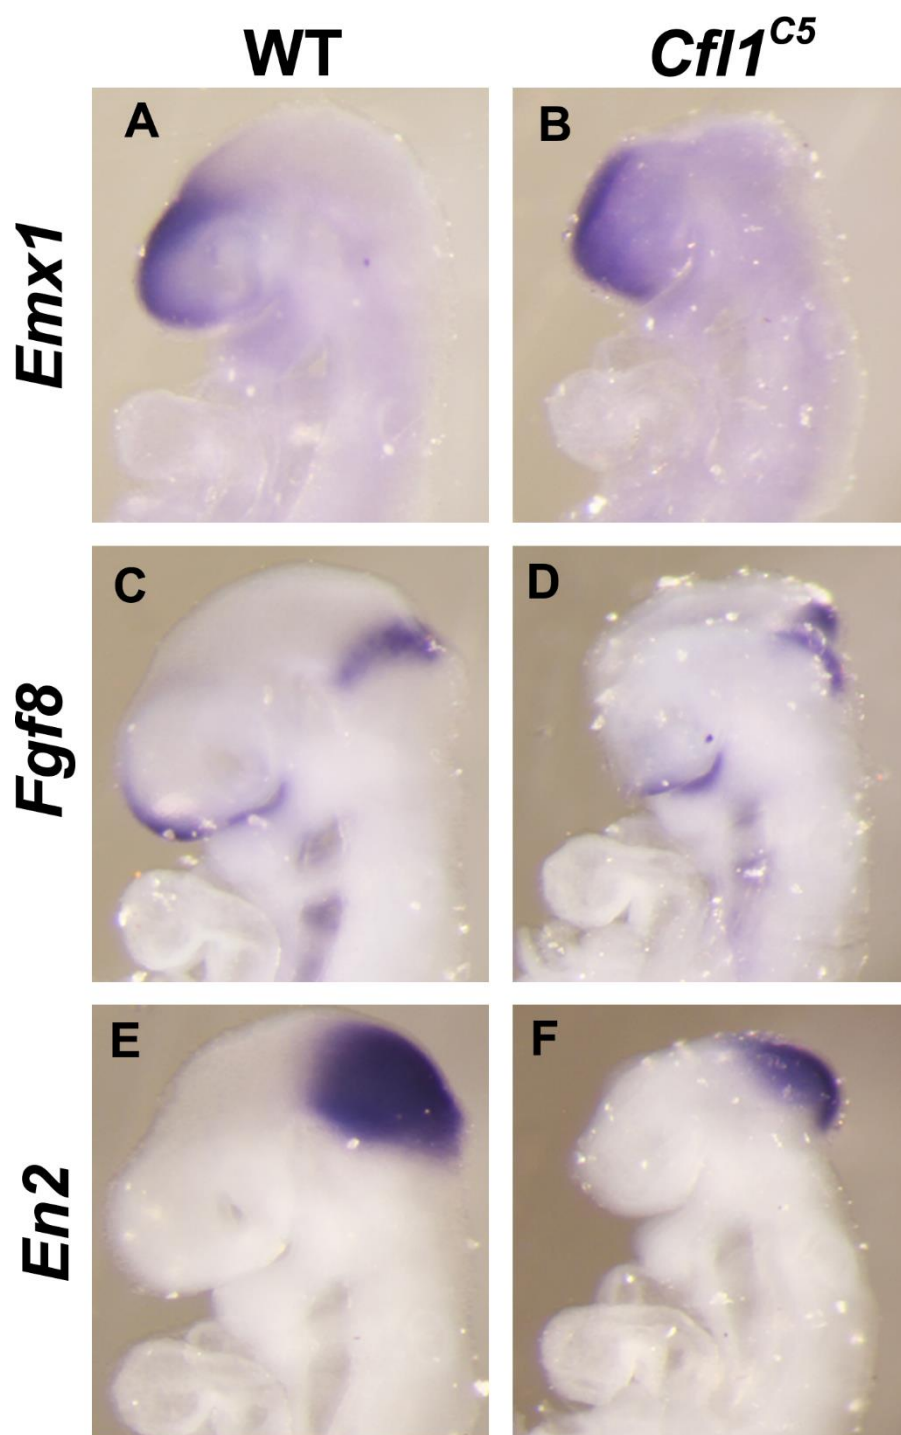

**Figure S1. Normal anterior-posterior patterning in the developing *Cfl1<sup>C5</sup>* brain.**

*In situ* hybridization of E9.5 WT and *Cfl1<sup>C5</sup>* embryos with **A, B)** the forebrain marker *emx1*, **C, D)** the midbrain-hindbrain junction marker *fgf8* and **E, F)** the hindbrain marker *en2*.

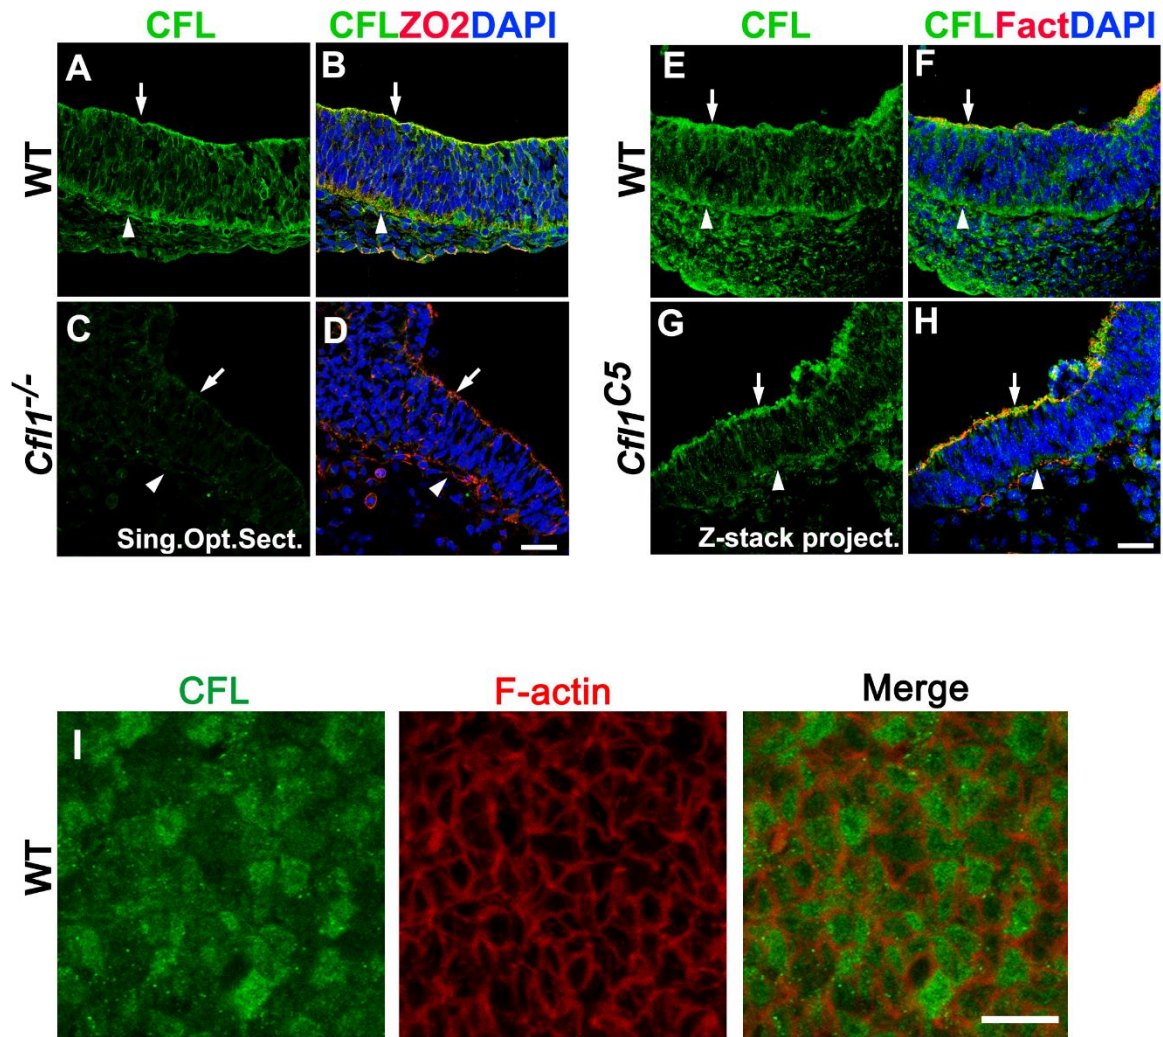

**Figure S2. CFL expression in WT and *Cfl1*<sup>tm1Wit</sup> E9.5 neural plate.**

Immunodetection of CFL and ZO2 in transverse sections of WT (A, B) and the *Cfl1*<sup>tm1Wit</sup> null allele at E9.5 (C, D) shows the specificity of CFL staining. Z-stack projection of 3 optical sections taken every 1 μm, showing double staining of CFL and F-actin in WT (E, F) and *Cfl1*<sup>C5</sup> (G, H) transverse sections. (I) *en face* images of CFL (green) and F-actin (red) expression of the apical domain of wild-type E9.5 cephalic neural tube. Arrows indicate apical, arrowheads indicate basal. Scale bar in A-D is 30 μm; in E is 10 μm.

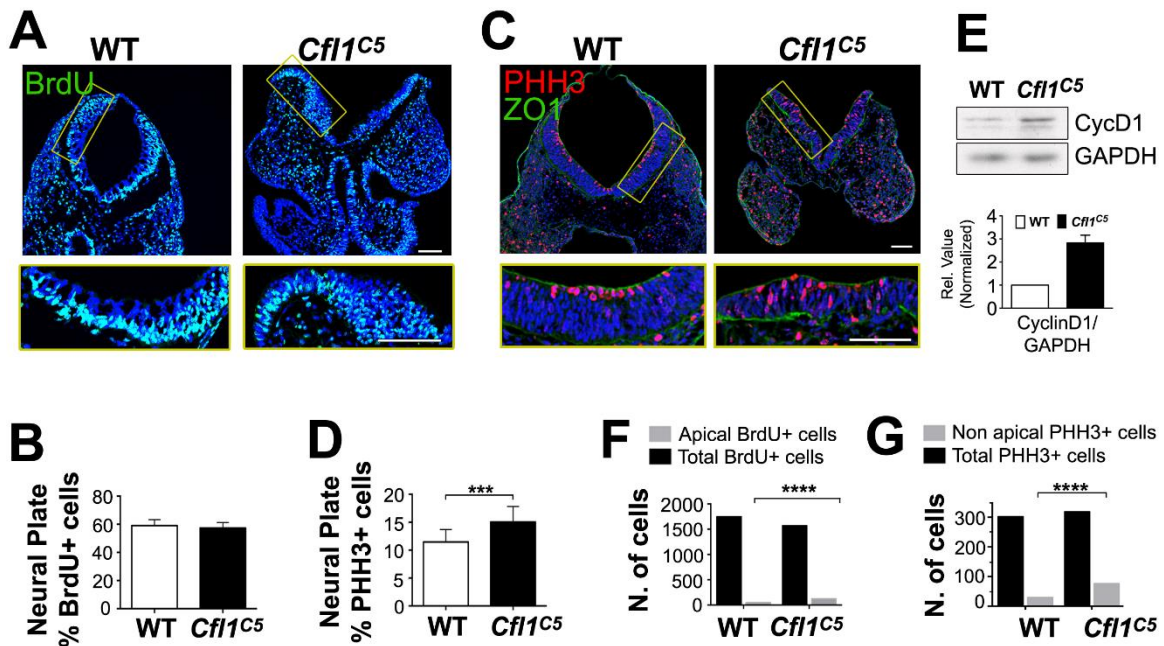

**Figure S3. Proliferation analysis in *Cfl1C5* mutant embryos.**

**A)** BrdU<sup>+</sup> cells (green) after a 25 min pulse in E9.5 WT and *Cfl1C5* transverse cephalic sections. **B)** Quantification S-phase neural plate cells. WT: 1692 BrdU<sup>+</sup> cells out of 3024 total, n=3 embryos; 56 ± 5%. *Cfl1C5*: 1578 BrdU<sup>+</sup> cells out of 2871 cells, n=3 embryos; 55 ± 4%; p = 0.0932; **C)** Phospho-histone H3 (PHH3) (red) and ZO1 (green) staining in E9.5 WT and *Cfl1C5* transverse cephalic sections. **D)** Mitotic index of cephalic neural plate: WT: 277 PHH3<sup>+</sup> cells out of 2321 total; 12 ± 2%; *Cfl1C5*: 224 PHH3<sup>+</sup> cells out of 1361; 15 ± 3%; \*\*\*p = 0.0001. **E)** Western blot of Cyclin D1 and GAPDH, and quantification normalized to WT. **F-G)** Analysis of interkinetic nuclear migration. **F)** Quantification of apical BrdU<sup>+</sup> cells. WT: 48 apical BrdU<sup>+</sup> out of 1747 cells, n=3 embryos; 3 ± 1%. *Cfl1C5*: 123 apical BrdU<sup>+</sup> out of 1569 cells, n=3 embryos; 8 ± 2%; \*\*\*\*p < 0.0001. **G)** Quantification of non-apical mitotic cells: WT: 29 out of 302; 10 ± 2%; *Cfl1C5*: 76 out of 318; 24 ± 11%; \*\*\*\*p < 0.0001. Scale bars: A and D 80 μm. Statistical analysis was performed using Chi square (Fisher's exact) test. Error bars indicate standard deviation.

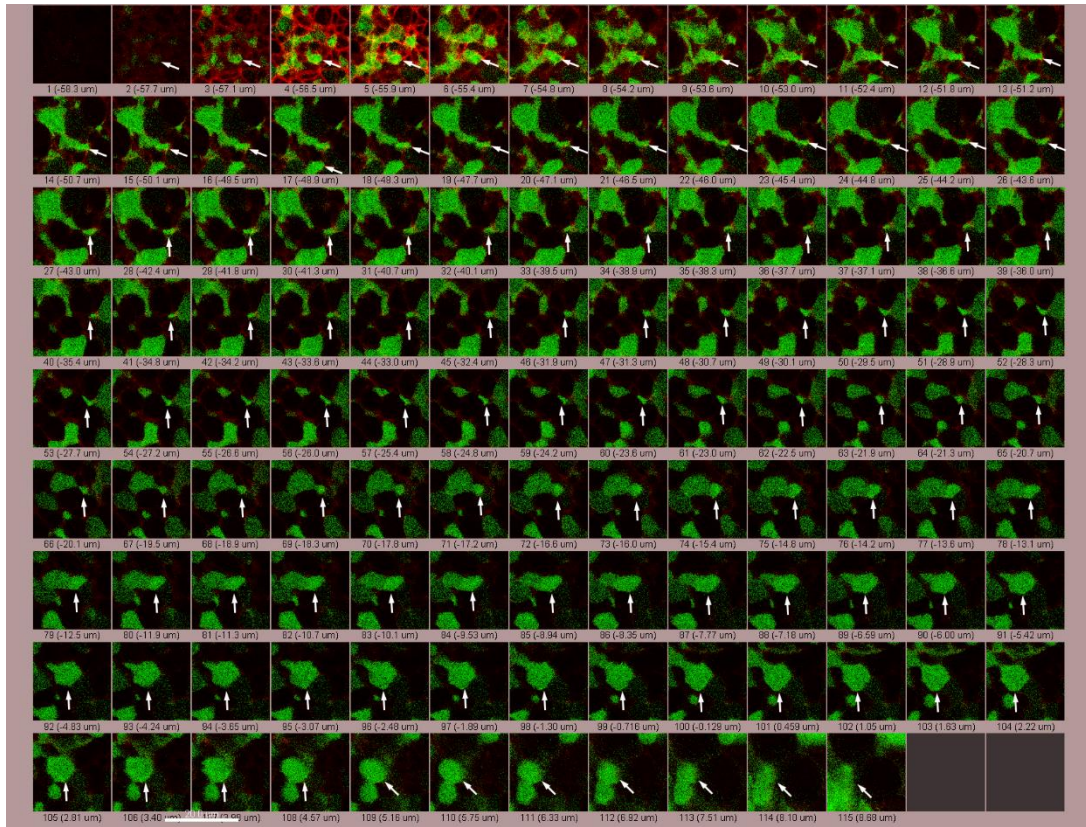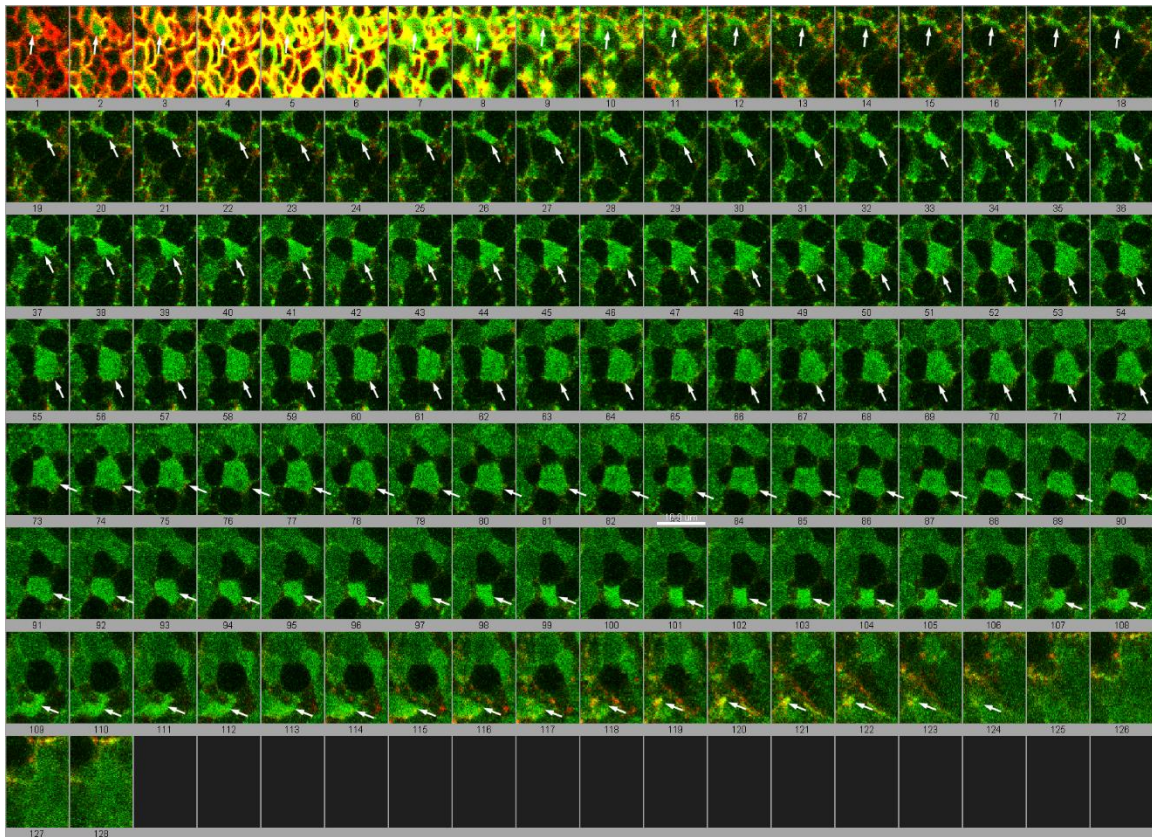

**Figure S4 and S5. Single optical sections along the Z axis of WT (Fig. S4) and *Cfl1*<sup>C5</sup> (Fig. S5) neuroepithelium.**

Single planes used to make the 3D rendering shown in Fig. 3D. Red is F-actin: Green is X-linked GFP. Arrows point a single cell along the apicobasal axis.

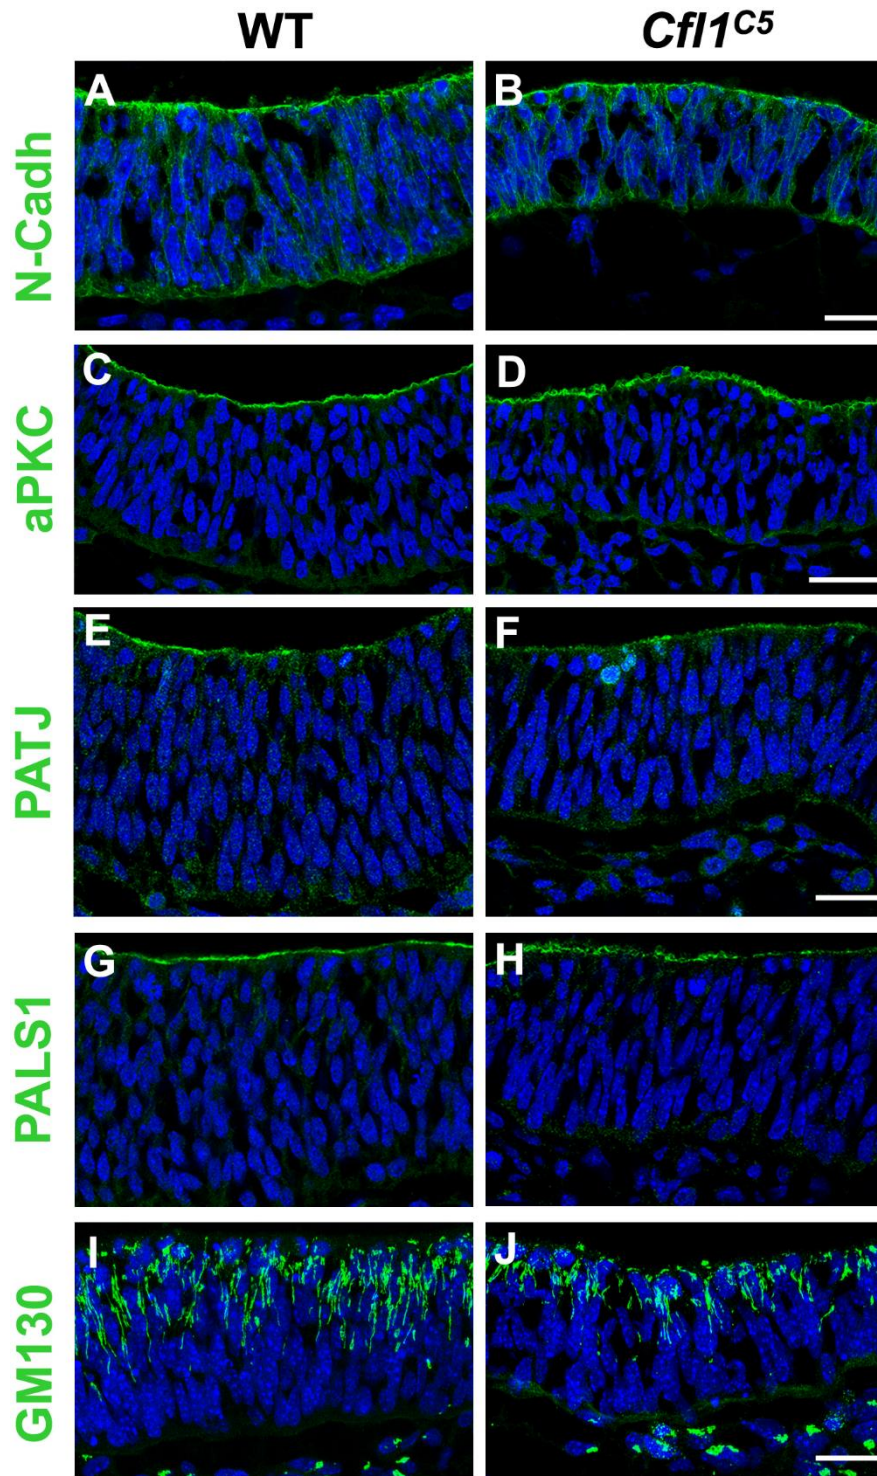

**Figure S6. Normal apical-basal polarity marker expression in the *Cfl1*<sup>C5</sup> neural plate.**

Transverse sections of E9.5 WT and *Cfl1*<sup>C5</sup> cephalic neural plates stained for **A, B**) N-Cadherin, **C, D**) aPKC, **E, F**) PATJ, **G, H**) PALS1, **I, J**) GM130. Blue is DAPI. **A, B, I** and **J** are Z-stack projections of 3 single optical sections taken every 1 $\mu$ m. Scale bar is 30 $\mu$ m.

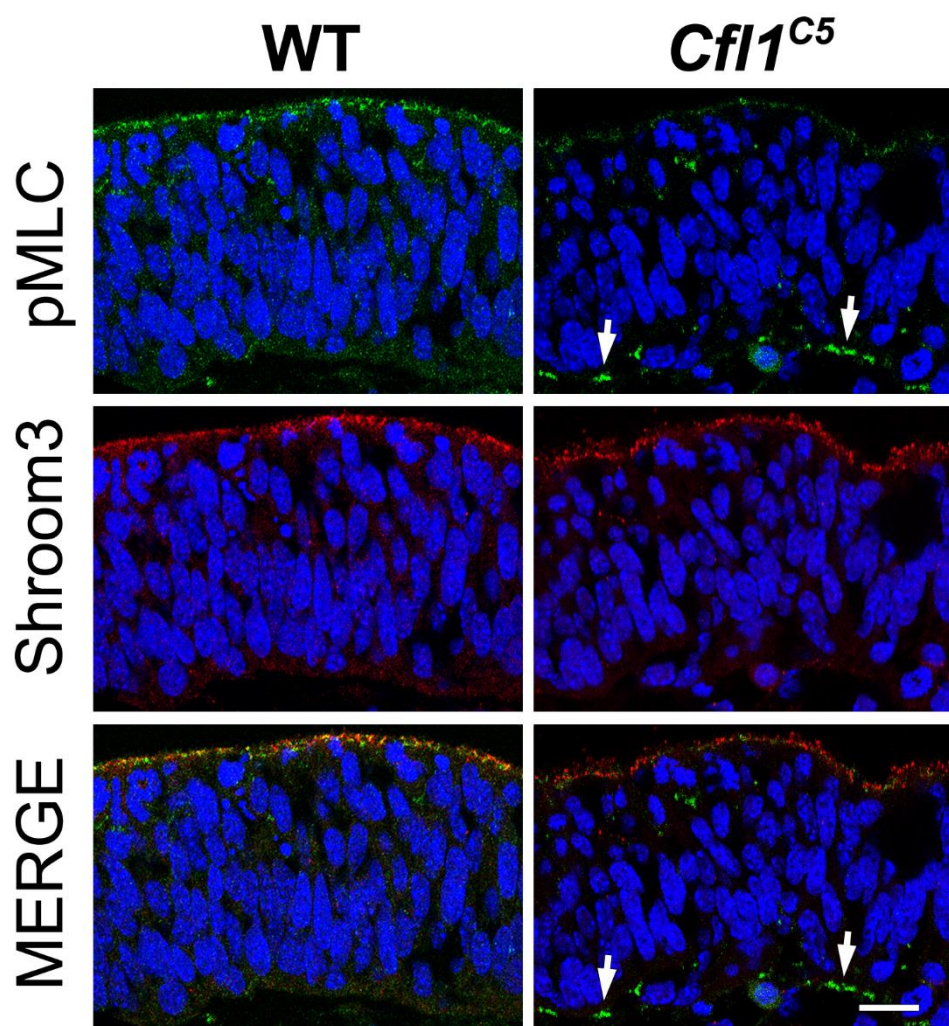

**Figure S7. Double labeling of pMLC and SHROOM3 in WT and *Cfl1*<sup>C5</sup> embryos at E9.5.**  
Z-stack projections of 3 optical sections taken every 1  $\mu\text{m}$ . from a cephalic transverse section.  
Arrows indicates ectopic localization. Scale bar is 30  $\mu\text{m}$ .

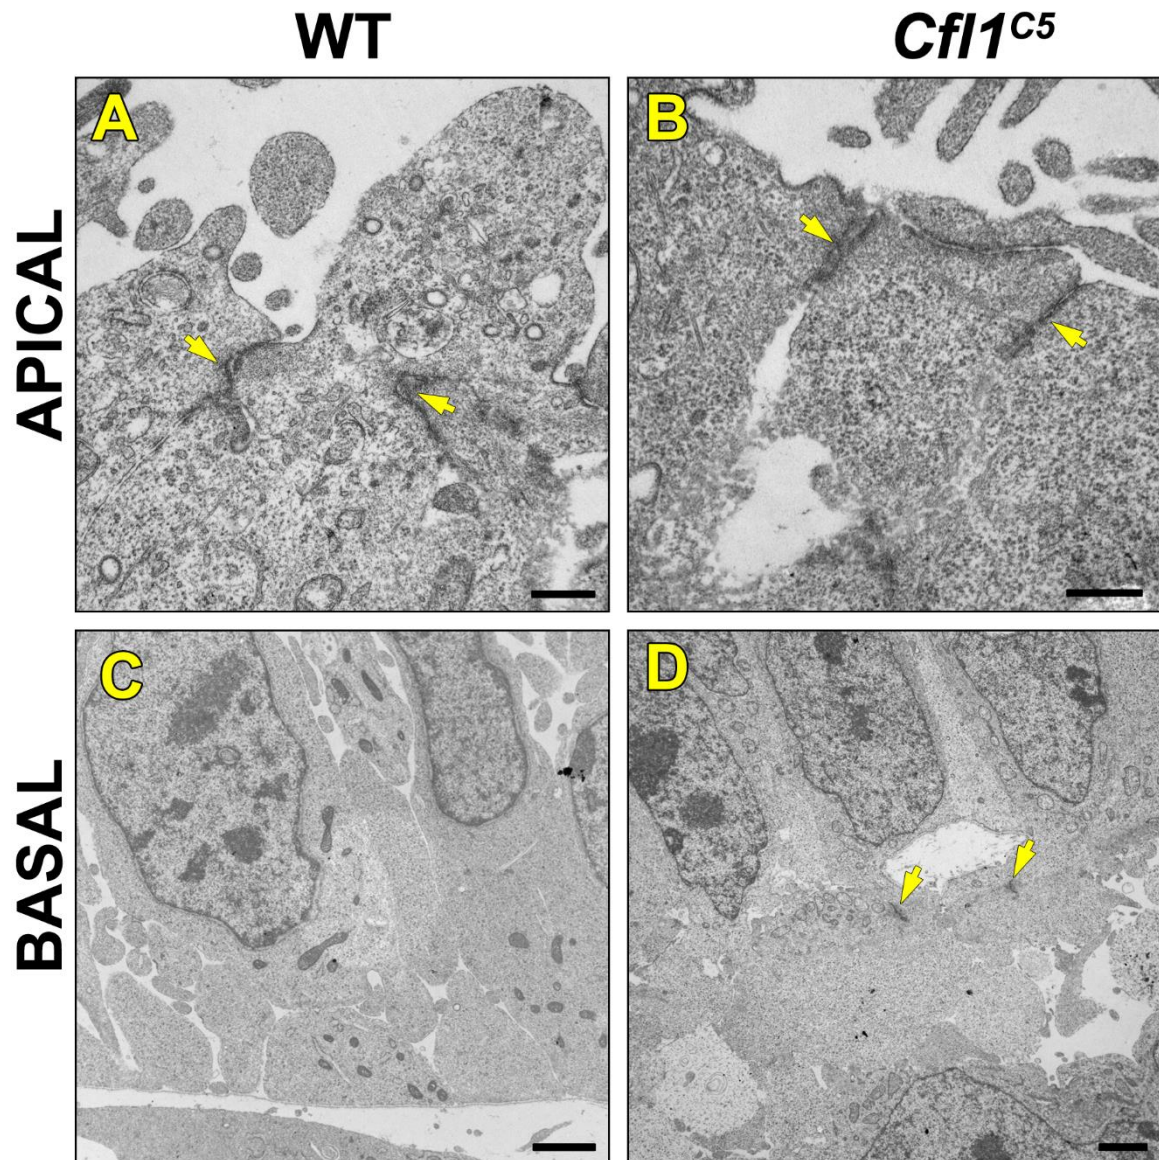

**Figure S8. Ultrastructure of apical and basal domains of cephalic neural plate.**

TEM analysis of E9.5 WT and *Cfl1<sup>C5</sup>* cephalic neural plates. **A, B)** Apical domain; **B, C)** Basal domain. Arrows indicate electron-dense particles. Scale bar in A and B is 500nm; in C and D is 2 $\mu$ m.



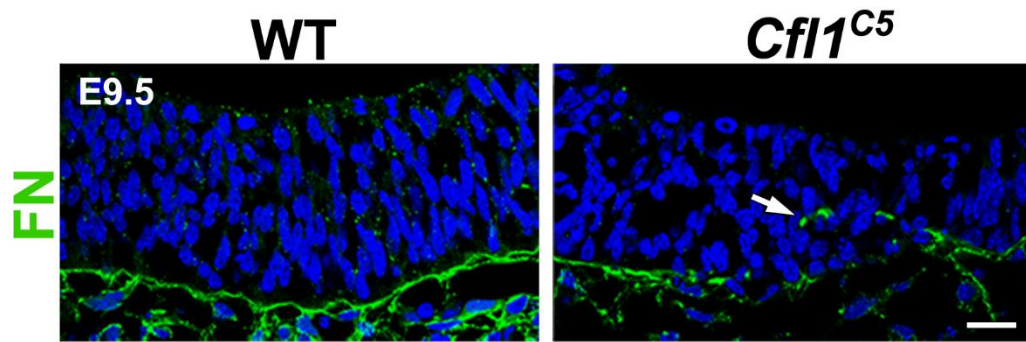

**Figure S9. Ectopic localization of fibronectin in *Cfl1*<sup>C5</sup> and ectopic cell clusters in the *Cfl1*<sup>C5</sup> neural plate** A) Fibronectin expression in E9.5 cephalic neural plate. Arrows indicate ectopic expression. Blue is DAPI. Scale bar 30  $\mu$ m.

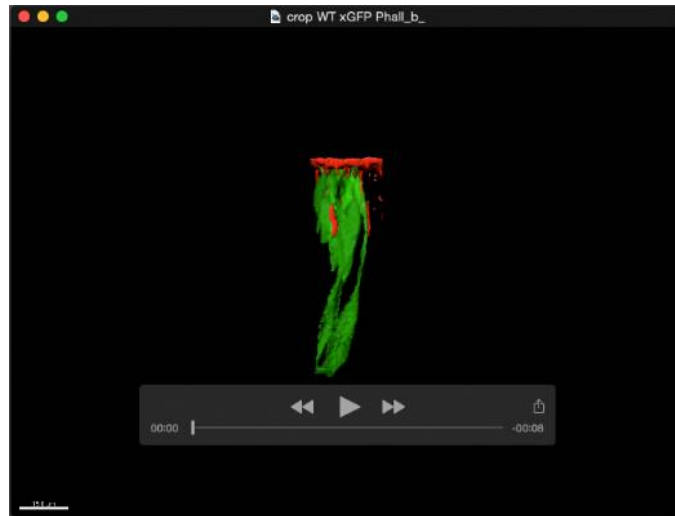

**Movie 1.** 3D rendering of a E9.5 WT X-linked GFP<sup>+</sup> cephalic neuroepithelial cell. F-actin (red) is apical; no overlapping signal can be detected at the basal domain.

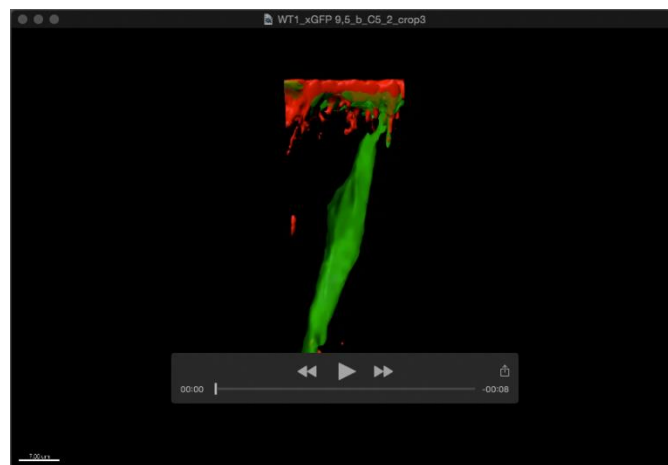

**Movie 2.** 3D rendering of a E9.5 *Cfl1*<sup>C5</sup> X-linked GFP<sup>+</sup> cephalic neuroepithelial cell. F-actin (red) is apical and basal, overlapping with endogenous GFP.
